# Supplementary material for: Norepinephrine is required to promote wakefulness and for hypocretin-induced arousal in zebrafish
Source: eLife journal article supplement (doi:10.7554/elife.07000), 2015-09-16

Figure 2–figure supplement 1

A

Homo sapiens: -MPALSR--WASLPGPSMREAAFMYSTAVAI FLVILVAALQGSAPRESP-LPYHIPLDPEGSELSWNVSYTQEAIFHQLLVRRLLKAGVLFGMSDRGEL  
Mus musculus: MQAHLHQPCWSSLSPSPSVREAAASYGTAVAI FLVILVAALRGSPPESP-FPYHIPLDPEGILELSWNVSYVQEIIFHQLQVQGLRAGVLFGMSDRGEM  
Danio rerio: -MRLINK-----DLRLQDVTLMYLTVLATVVVLLVASYPAPAGQSRPTLAYHIPLDPSSGQLELSWNI SYPKQEVLLLEVKKELHHGII LGMSDRGEP  
Danio rerio mutant: -MRLINK-----DLRLQDVTLMYLTVLATVVVLLVASYPAPAGQSRPTLAYHIPLDPSSGQLELSWNI SYPKQEVLLLEVKKELHHGII LGMSDRGEP

Homo sapiens: ENADLVVLWTDGDTAYFADAWSDDKGOIHLDPQDDYQLLQVQRTPEGLTLLFKRPFGTCDPKDYLI EDGTVHLVYGILEEPFRSL EAINSGSGLQMGLQRY  
Mus musculus: ENADLIMLWTDGDRAYFADAWSDDKGOIHLDSQQDYQLLQVQRTDGLSLLFKRPFVTCDDPKDYVI EDDTVHLVYGILEEPFQSL EAINSGSGLHTGLQRY  
Danio rerio: TNADLVILWDDGHKSYPGDAWSDSEGRVTLDTQQDYQLLETHQSTEGFFLLFKRSFSTCDPHDYII EEGTVHII YTMLEHPILSLH ELNII SRLQPGVQRY  
Danio rerio mutant: TNADLVILWDDGHKSYPGDAWSDSEGRVTLDTQQDYQLLETHQSTEGFFLLFKRSFSTCDPHDYII EEGTVHII YTMLEHPILSFVA-----

Homo sapiens: QLLKPNIPPELP SDACTMEVQAPNIQIPSQETTYWCYIKELPKGFSRHHII KYEPIVTKGNEALVHHMEVFQCAPEMDSVPHFSGPCDSKMKPDRNLNYC  
Mus musculus: QLLKSEVPTSPMPEDVQTMDIRAPDILIPDNETTYWCYITELPPRFPRHHII MYEAI VTEGNEALVHHMEVFQCAAESEDFPQFNGPCDSKMKPDRNLNYC  
Danio rerio: LLLRPDTPSPHLPKDVRTL EVLAPDVI IPTQETTYWCYIYQLPPNLPKNHIVMYESVITPGNEAIVHHIEVFECSPQMDIVPQYSGSCDSKMKPRNLNYC  
Danio rerio mutant: LLLRPDTPSPHLPKDVRTL EVLAPDVI IPTQETTYWCYIYQLPPNLPKNHIVMYESVITPGNEAIVHHIEVFECSPQMDIVPQYSGSCDSKMKPRNLNYC

Homo sapiens: RHVLA AAWALGAKAFYYP EEEAGLAFGGPGSSRYLRLEVHYHNP LVI EGRNDSGIRLYYTAKLRRFNAGIMELGLVYTPVMAIPPRETAFILTGCTDKCT  
Mus musculus: RHVLA AAWALGAKAFYYP KEAGVPFGGPGSSPFLRLEVHYHNP RKIQGRQDSSGIRLHYTATLRRYDAGIMELGLVYTPVMAIPPRETAFVLTGCTDKCT  
Danio rerio: RHVLA AAWAMGAEPFYYPADAGLPMGGEGSSRFLRLEVHYHNP LLLSGRRDSSGIRLWYSPSLRRFDAGIMELGLVYTPVMAIPPRQRSFQLTGCTAKCT  
Danio rerio mutant: RHVLA AAWAMGAEPFYYPADAGLPMGGEGSSRFLRLEVHYHNP LLLSGRRDSSGIRLWYSPSLRRFDAGIMELGLVYTPVMAIPPRQRSFQLTGCTAKCT

Homo sapiens: QLALPPSGI IIFASQLHHTLGRKVVTVLVRDGREWEIVNODNHYSHPHQEI RMLKKVVS VHPGDVLITSTCTYNTEDRELATVGGFGILEEMCVNYVHHY  
Mus musculus: QMALQDSGI IIFASQLHHTLGRKVVTVLARDGQERKVVNRDNHYSHPHQEI RMLKKVVT VYPGDVLITSTCTYNTENKTLATVGGFGILEEMCVNYVHHY  
Danio rerio: QTALPVGGI IIFASQLHHTLAGLGVRTVLVRGGQEVVVQEDKHFS THYQIIRVLQKMTVLPGDALLTTCRFNTEDRSKVTVGGFGIMEEMCVNYVHHY  
Danio rerio mutant: QTALPVGGI IIFASQLHHTLAGLGVRTVLVRGGQEVVVQEDKHFS THYQIIRVLQKMTVLPGDALLTTCRFNTEDRSKVTVGGFGIMEEMCVNYVHHY

Homo sapiens: PQTQLELCKSAVDAGFLQKYFHLINRFNNEVDCTCPQASVSQQFTSVPWNSFNRDVLKALYSFAPISMHCNKSSAVRFQGEWNLOPLPKVIISTLEETPQ  
Mus musculus: PQTQLELCKSAVDAGFLQKYFHMVNRFSSEEVCTCPQASVPPQFSSVPWNSFNRDMLKALYDYAPISMHCNKTSAVRFPGEWNLOPLPKITSTLEETPQ  
Danio rerio: PRTQLELCKSHVDTDYLOKYSFLINRFQGRSCSCPQTSVEEQFSSVSWDSFSGEVLNSLYVTAPFSMHCNQSTAQLFPGDWEKQEIIPVVT AQLQRAPY  
Danio rerio mutant: PRTQLELCKSHVDTDYLOKYSFLINRFQGRSCSCPQTSVEEQFSSVSWDSFSGEVLNSLYVTAPFSMHCNQSTAQLFPGDWEKQEIIPVVT AQLQRAPY

Homo sapiens: CPTSQGRSPAGPTV-VSIGGGKG  
Mus musculus: CPIRQTQSPANPTVPITTEADAE  
Danio rerio: CEINRRVASNNDSPTTEVRADSSG  
Danio rerio mutant: -----

B

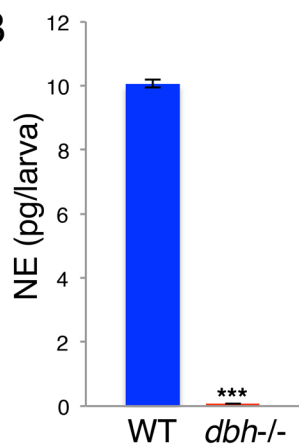

C

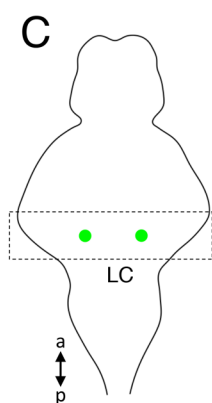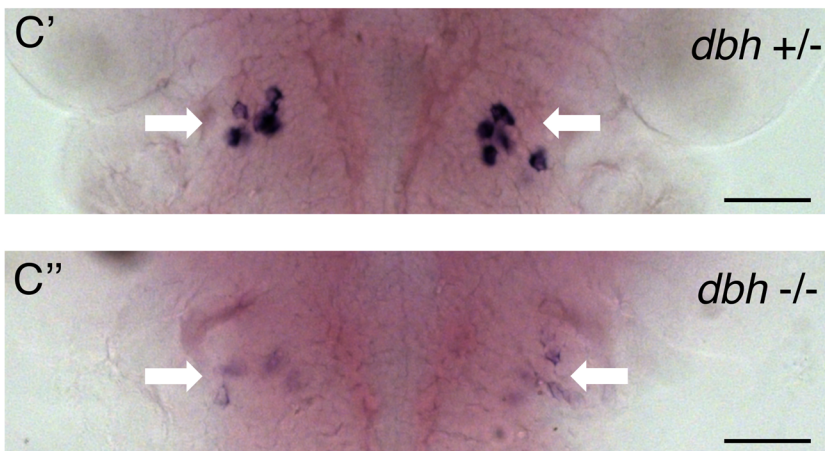

Supplement: supp [file elife-07000-supp-v1.zip]
