# Supplementary figures and images for: Norepinephrine is required to promote wakefulness and for hypocretin-induced arousal in zebrafish
Source: eLife journal article supplement (doi:10.7554/elife.07000), 2015-09-16

Figure 1-figure supplement 1

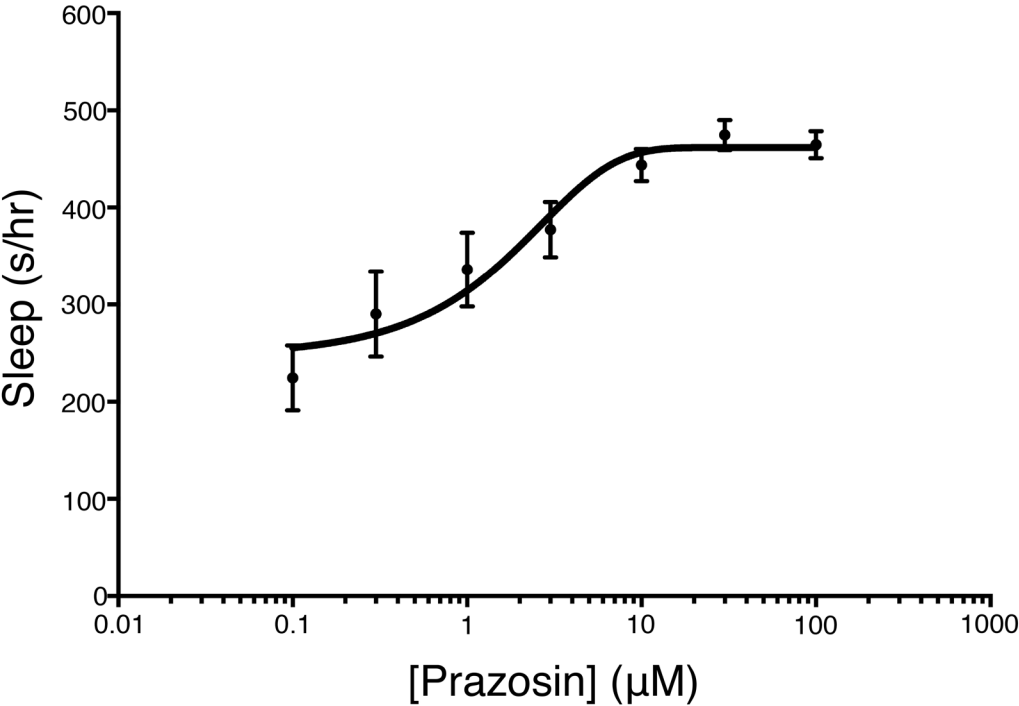

Supplement: supp [file elife-07000-supp-v1.zip]

Figure 1-figure supplement 3

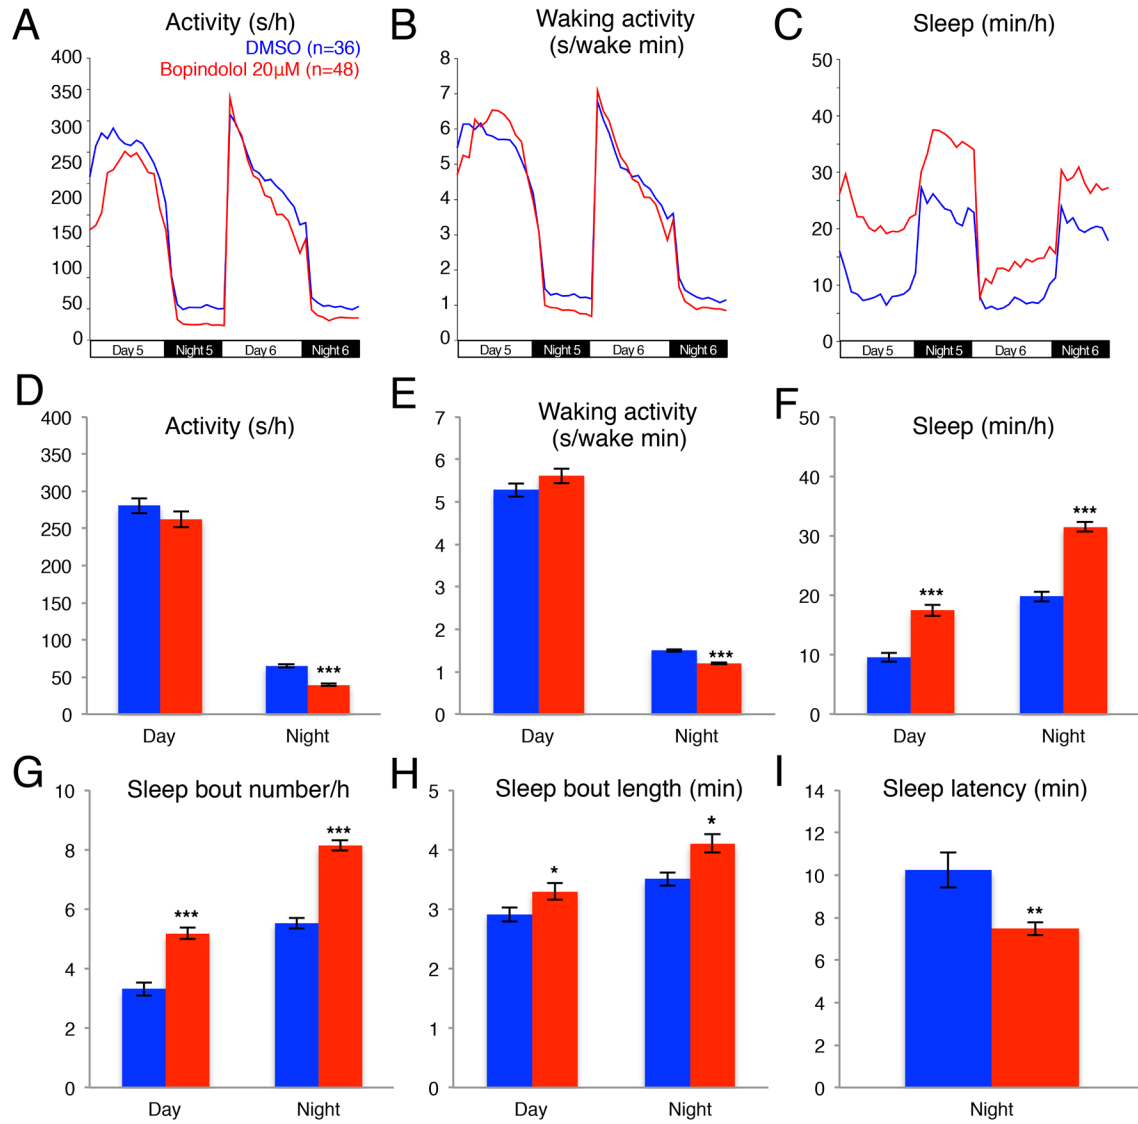

Supplement: supp [file elife-07000-supp-v1.zip]

Figure 1-figure supplement 2

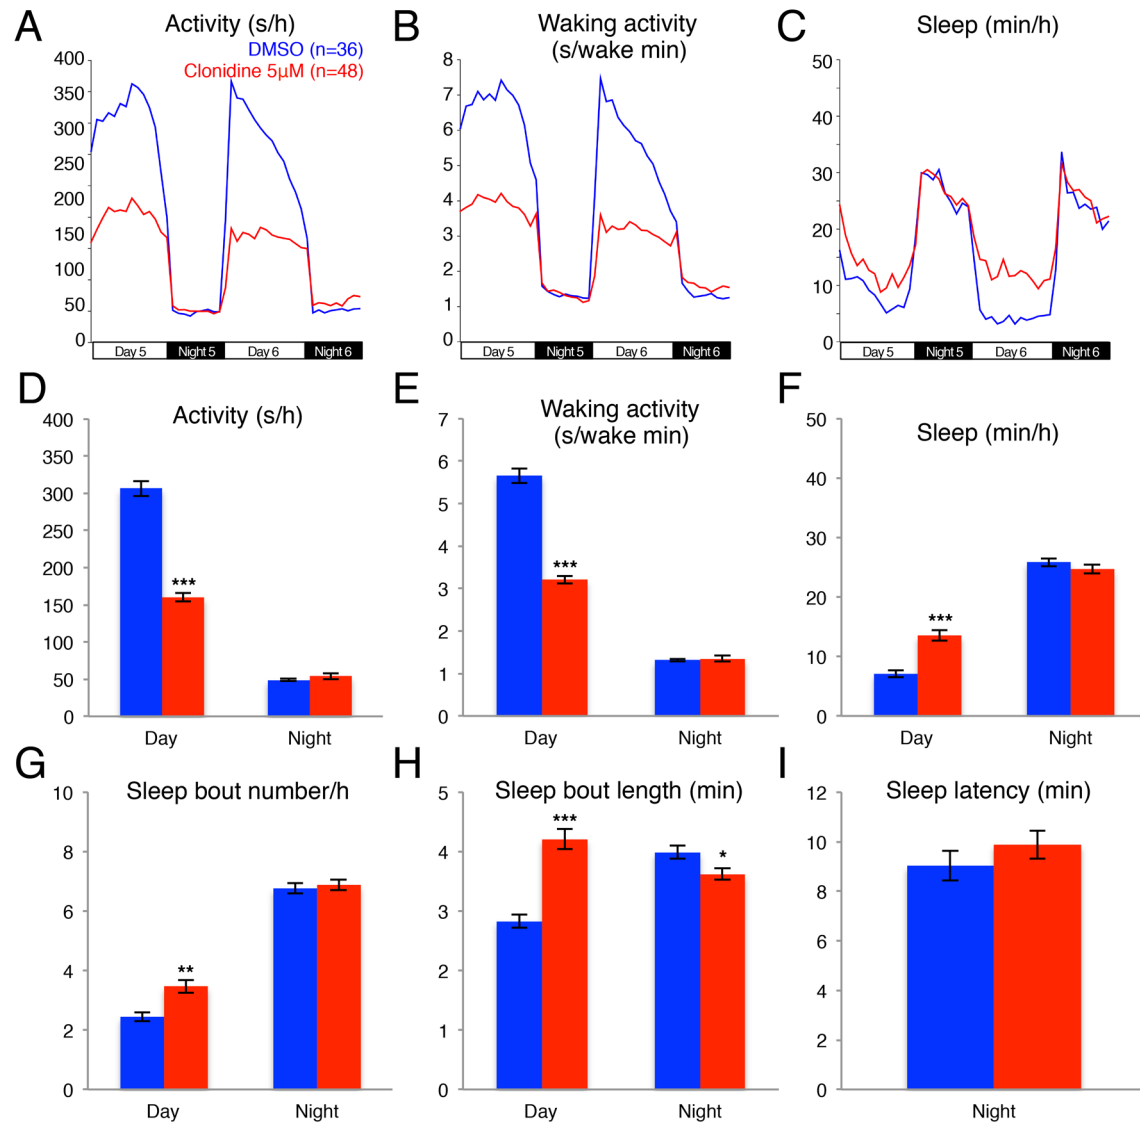

Supplement: supp [file elife-07000-supp-v1.zip]

Figure 4—figure supplement 3

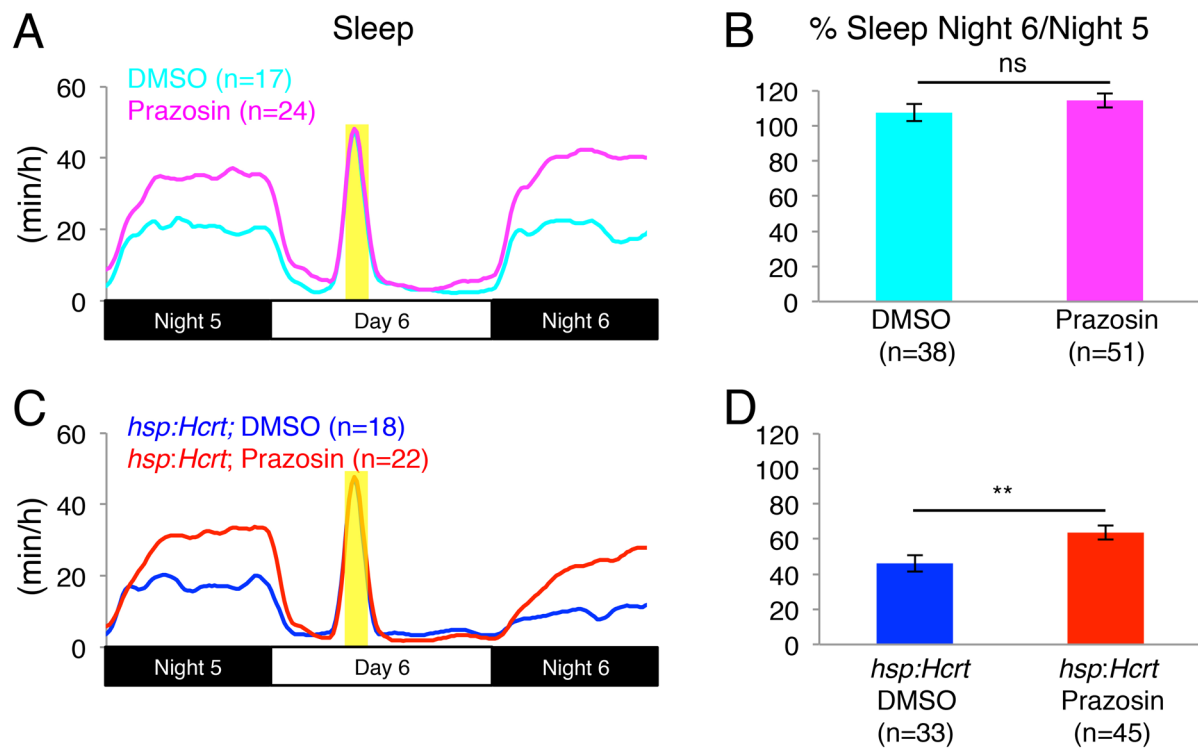

Supplement: supp [file elife-07000-supp-v1.zip]

Figure 2-figure supplement 2

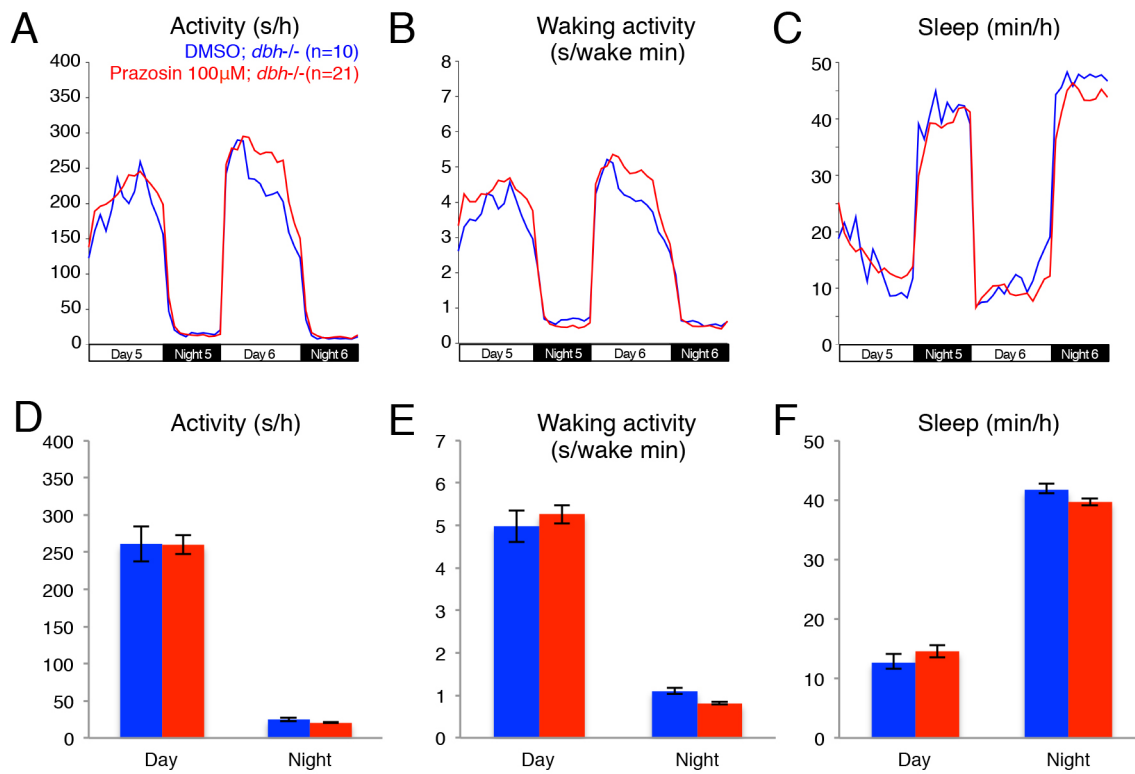

Supplement: supp [file elife-07000-supp-v1.zip]

Figure 4—figure supplement 4

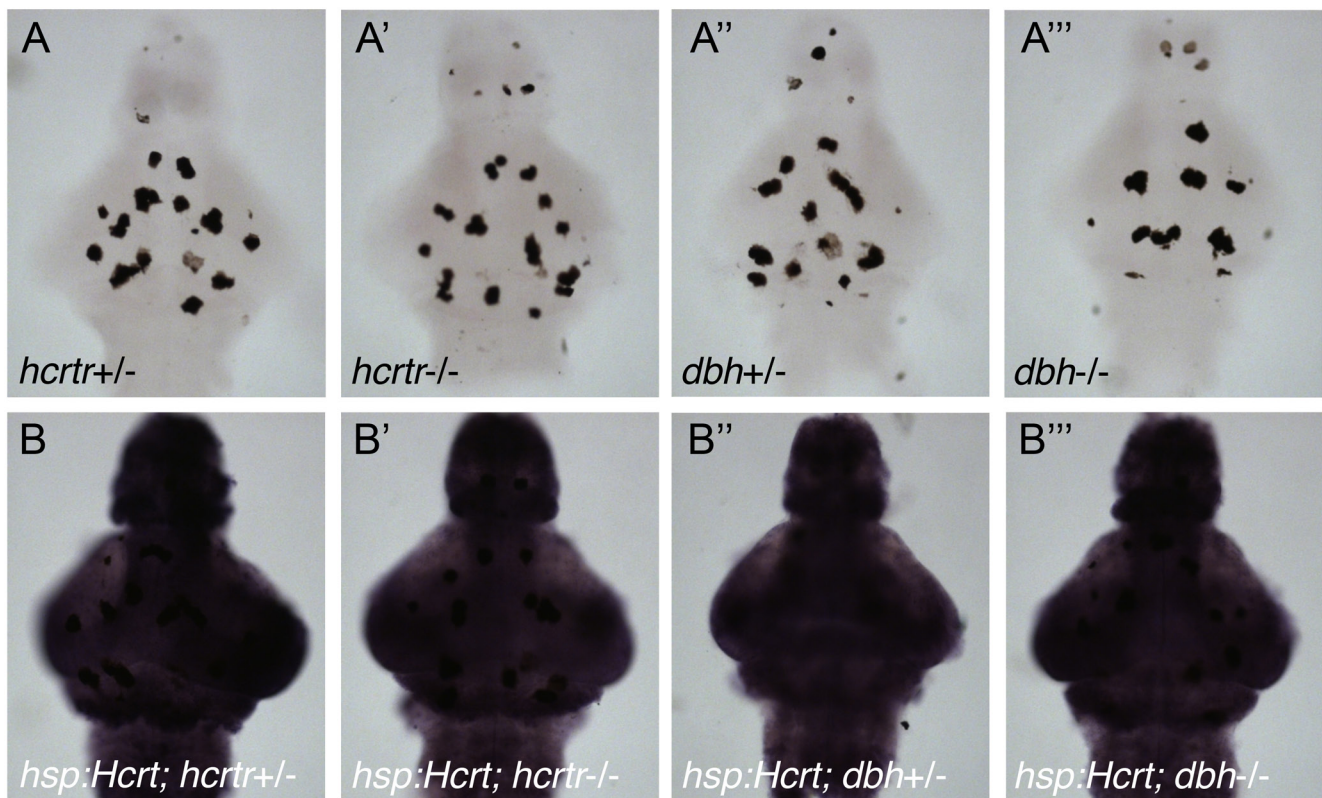

Supplement: supp [file elife-07000-supp-v1.zip]

Figure 6—figure supplement 1

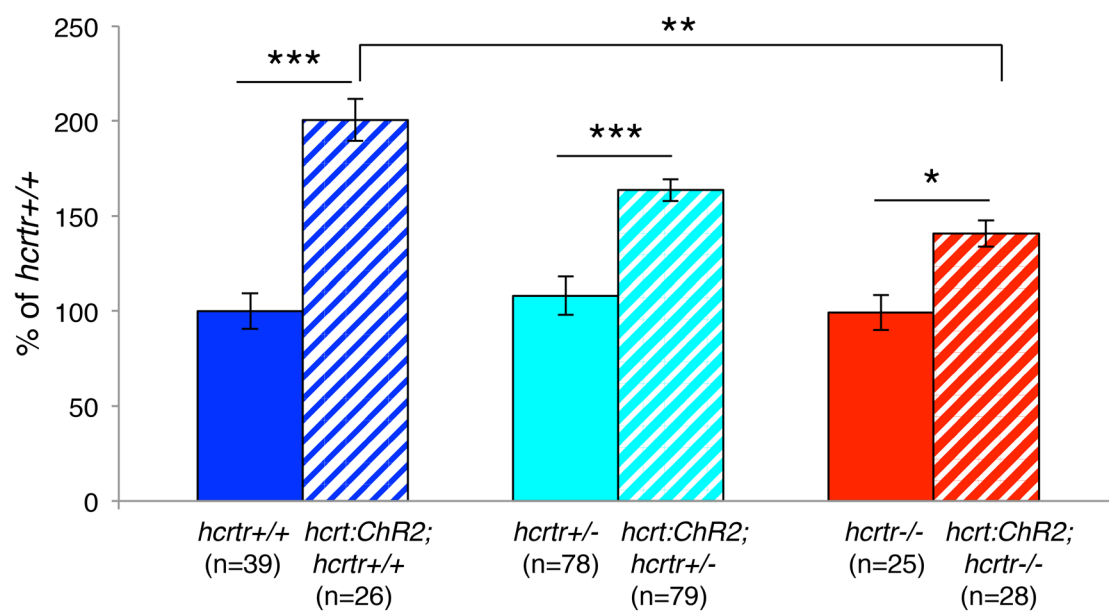

Supplement: supp [file elife-07000-supp-v1.zip]

Figure 4—figure supplement 2

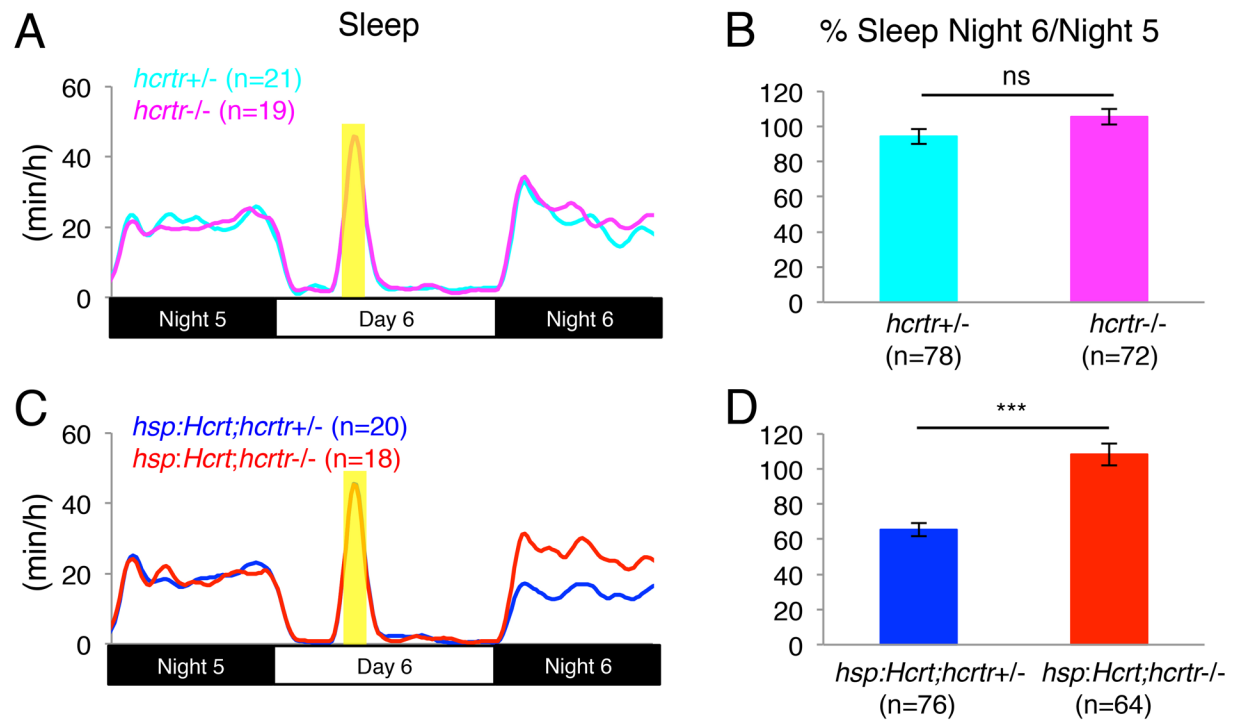

Supplement: supp [file elife-07000-supp-v1.zip]

Figure 5—figure supplement 1

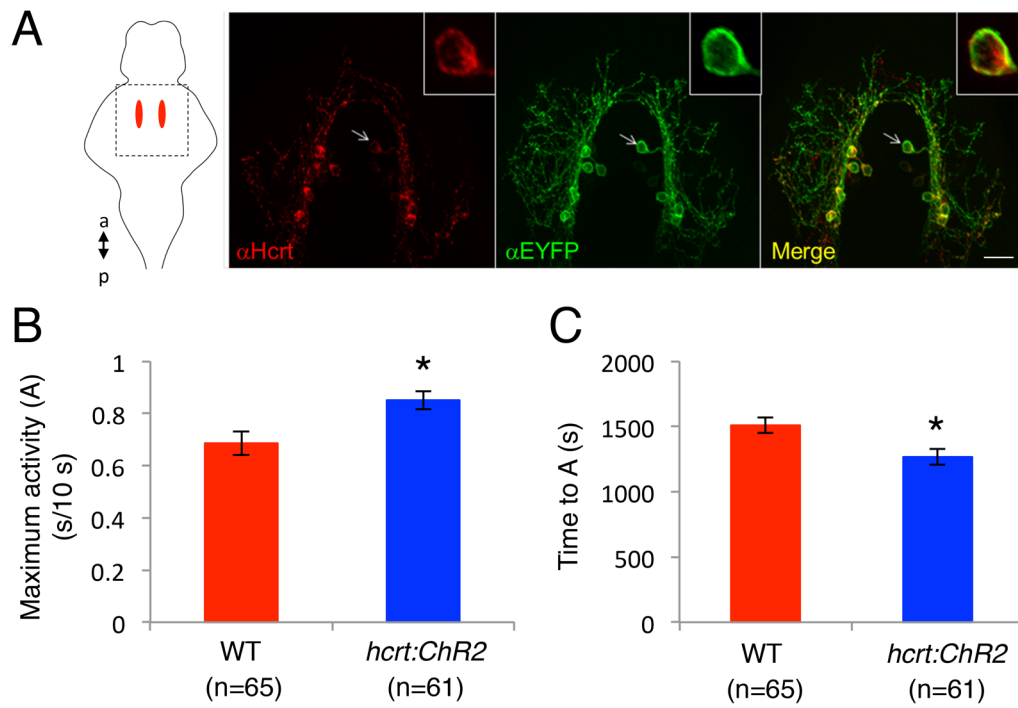

Supplement: supp [file elife-07000-supp-v1.zip]

Figure 4—figure supplement 1

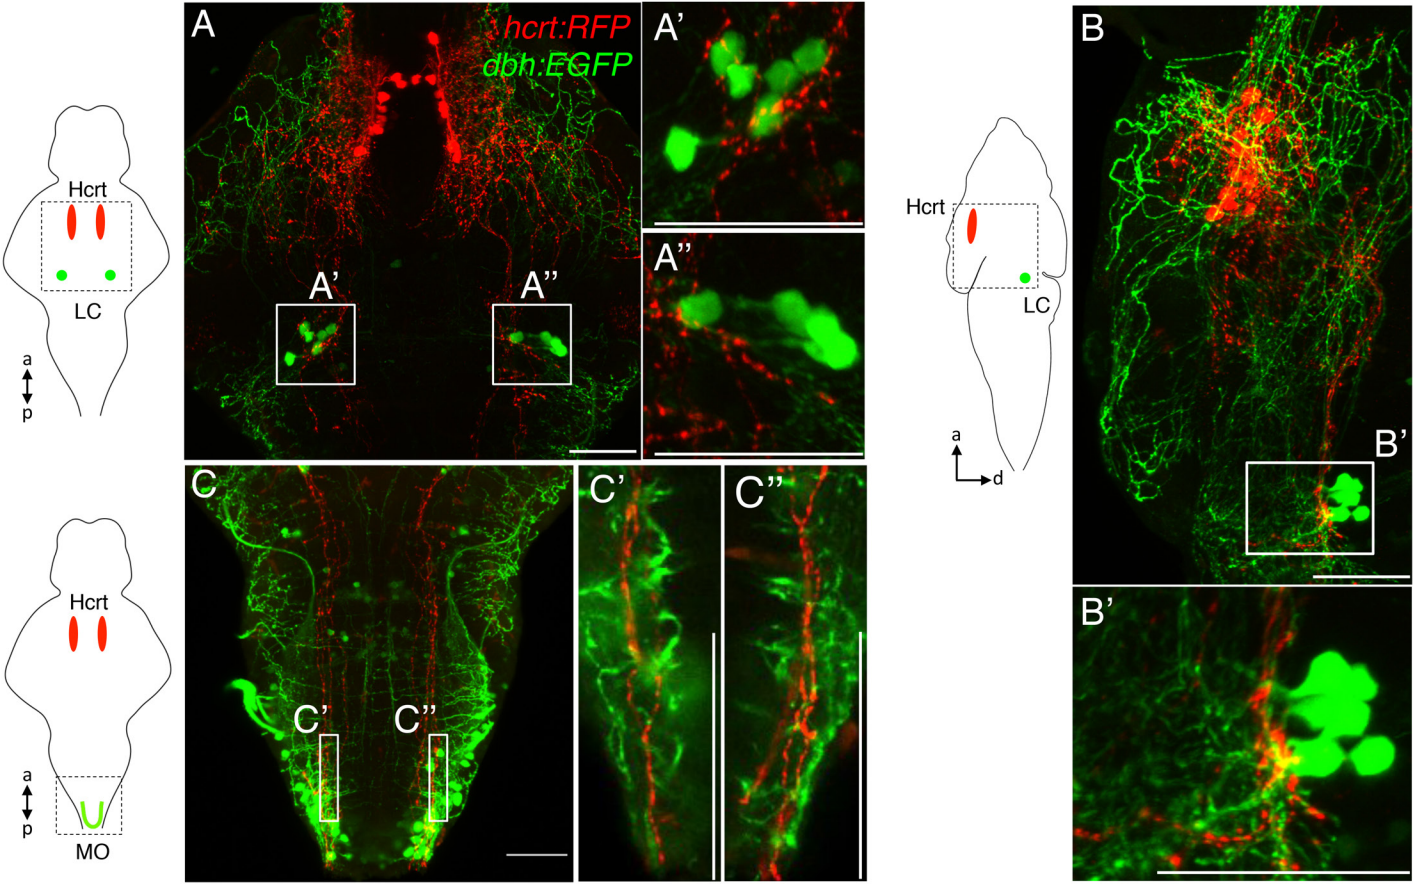

Supplement: supp [file elife-07000-supp-v1.zip]
